# Supplementary material
Source: Springer Nature journal article supplement (https://www.springermedizin.de/resource/supplementary/12865_2013_606_MOESM11_ESM.pdf/9428258)

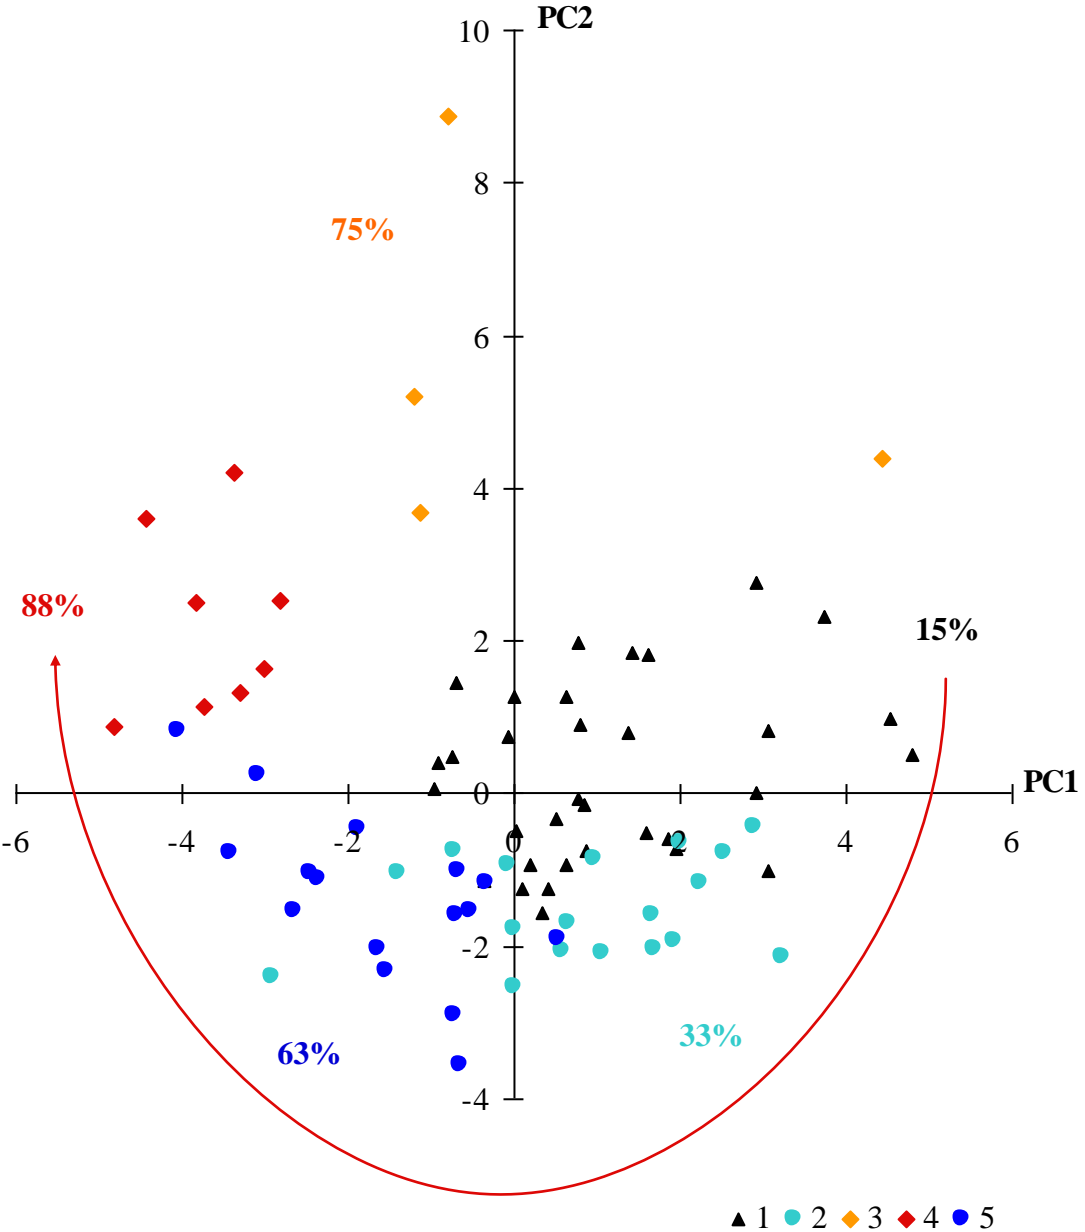

Supplement: MOESM11 [file 9428258]
